# Supplementary material for: Colistin Resistance Mechanisms in Human and Veterinary Klebsiella pneumoniae Isolates
Source: MDPI journal article supplement (doi:10.3390/antibiotics11111672), 2022-11-21
Supplement: s1 [file s1]

## Supporting Information

# Colistin Resistance Mechanisms in Human and Veterinary *Klebsiella pneumoniae* Isolates

Manuela Tietgen <sup>1,2,†</sup>, Lisa Sedlacek <sup>1,†</sup>, Paul G. Higgins <sup>3</sup>, Heike Kaspar <sup>4</sup>, Christa Ewers <sup>5</sup> and Stephan Göttig <sup>1,\*</sup>

<sup>1</sup> Institute of Medical Microbiology and Infection Control, Hospital of the Johann Wolfgang von Goethe University, D-60596 Frankfurt am Main, Germany

<sup>2</sup> University Center of Competence for Infection Control of the State of Hesse, D-60596 Frankfurt am Main, Germany

<sup>3</sup> Institute for Medical Microbiology, Immunology and Hygiene, Faculty of Medicine and University Hospital Cologne, University of Cologne, D-50935 Cologne, Germany

<sup>4</sup> Federal Office of Consumer Protection and Food Safety, D-10117 Berlin, Germany

<sup>5</sup> Institute of Hygiene and Infectious Diseases of Animals, Justus Liebig University Giessen, D-35392 Giessen, Germany

\* Correspondence: [stephan.goettig@kgu.de](mailto:stephan.goettig@kgu.de)

† These authors contributed equally to this work.

**Supplementary Table S1.** Primers used for detection and Sanger sequencing of beta-lactamase genes and mutations in the genes *mgrB*, *pmrAB* and *phoPQ*.

| Name                | Sequence (5'→3')      | Gene                               | Size [bp] | Annealing temperature [°C] | Ref.       |
|---------------------|-----------------------|------------------------------------|-----------|----------------------------|------------|
| CTX-M_F             | TTAGGAARTGTGCCGCTGYA  | <i>bla</i> <sub>CTX-M-1-like</sub> | 688       | 60                         | 11         |
| CTX-M_R             | CGATATCGTTGGTGGTRCCAT |                                    |           |                            |            |
| SHV_schles_F        | TTTATCGGCCYTCACTCAAGG | <i>bla</i> <sub>SHV</sub>          | 776       | 50                         | 12         |
| SHV_schles_R        | AGATAAATCACCACAATGCGC |                                    |           |                            |            |
| <i>mgrB</i> _can_f  | AAGGCGTTCATTCTACCAC   | <i>mgrB</i>                        | 253       | 56                         | 9          |
| <i>mgrB</i> _can_R  | TTAAGAAGGCCGTGCTATCC  |                                    |           |                            |            |
| <i>mgrB</i> _new_1F | TTTGTATGATCCCTGGCGTGA | <i>mgrB</i>                        | 269       | 56                         | This study |
| <i>mgrB</i> _new_1R | AATAGTGCAAATGCCGCTGA  |                                    |           |                            |            |
| <i>mgrB</i> _new_2F | ACTGATAGTCATCATAGCAG  | <i>mgrB</i>                        | 344       | 56                         | This study |
| <i>mgrB</i> _new_2R | AGCAGCGCTTGCAGCAGCTC  |                                    |           |                            |            |
| <i>pmrA</i> _F      | CTCCACATGTTTCTGGTTGT  | <i>pmrA</i>                        | 960       | 58                         | This study |
| <i>pmrA</i> _R      | TCGCAGGATAATCTGTTCTC  |                                    |           |                            |            |
| <i>pmrB</i> _F      | TTCTCTTATCGTCCTGCTTG  | <i>pmrB</i>                        | 1411      | 58                         | This study |
| <i>pmrB</i> _R      | CAATACCCTGGAAGTGCATA  |                                    |           |                            |            |
| <i>phoP</i> _F      | GCAGGTGTCTGACAGGGATT  | <i>phoP</i>                        | 1467      | 58                         | This study |
| <i>phoP</i> _R      | AGGCTGAATACCCACAGGAC  |                                    |           |                            |            |
| <i>phoQ</i> _F      | ATGACAGCGGGAAGATATGC  | <i>phoQ</i>                        | 672       | 58                         | This study |
| <i>phoQ</i> _R      | GAGCGTCAGACTACTATCGA  |                                    |           |                            |            |

**Supplementary Table S2.** Presence of antibiotic resistance genes in clinical *Klebsiella pneumoniae* isolates as determined by ResFinder (<https://cge.food.dtu.dk/services/ResFinder/>). The selected threshold for identification was 98% with a minimum length of 80%. All isolates harboured *oqx*A, *oqx*B and *fos*A.

|                                                 | Veterinary isolates                    |             |           |           |                                                |                                                     | Human isolates                                                                 |                                         |                                                              |                                                                |                                                                                      |                                                            |                                                                                      |                                          |                                                                             |                                                                                                        |                                             |                                  |
|-------------------------------------------------|----------------------------------------|-------------|-----------|-----------|------------------------------------------------|-----------------------------------------------------|--------------------------------------------------------------------------------|-----------------------------------------|--------------------------------------------------------------|----------------------------------------------------------------|--------------------------------------------------------------------------------------|------------------------------------------------------------|--------------------------------------------------------------------------------------|------------------------------------------|-----------------------------------------------------------------------------|--------------------------------------------------------------------------------------------------------|---------------------------------------------|----------------------------------|
| Antibiotic class                                | IHIT27665                              | IHIT27662   | IHIT27663 | IHIT27664 | IHIT32358                                      | IHIT33535                                           | KP_03                                                                          | KP_53                                   | KP_54                                                        | KP_1153                                                        | KP_1200                                                                              | KP_1377                                                    | KP_1585                                                                              | KP_1710                                  | KP_1954                                                                     | KP_2442                                                                                                | KP_3405                                     | KP_3996                          |
| <b>Beta-lactam</b><br><i>(bla)</i> <sup>b</sup> | TEM-1B,<br>SHV-28,<br>CTX-M-1          | SHV-27-like | SHV-1     | SHV-36    | SHV-28                                         | TEM-1B,<br>SHV-28,<br>CTX-M-15                      | SHV-1,<br>OXA-1                                                                | TEM-1B,<br>SHV-1,<br>OXA-1,<br>CTX-M-15 | SHV-11,<br>OXA-1,<br>DHA-1                                   | TEM-1B,<br>SHV-11,<br>CTX-M-15                                 | TEM-1B,<br>SHV-27,<br>OXA-1,<br>CTX-M-15                                             | TEM-1A,<br>SHV-12,<br>OXA-9,<br>KPC-2                      | TEM-1B,<br>SHV-11,<br>OXA-1,<br>CTX-M-15                                             | TEM-1B,<br>SHV-11,<br>OXA-1,<br>CTX-M-15 | TEM-1A,<br>OXA-9,<br>KPC-2                                                  | TEM-1B,<br>SHV-28,<br>OXA-1,<br>CTX-M-15                                                               | TEM-1A,<br>SHV-28,<br>OXA-1,<br>CTX-M-15    | SHV-1,<br>KPC-3                  |
| <b>Aminoglycoside</b>                           | <i>aph(4)-la</i> ,<br><i>aac(3)-IV</i> | -           | -         | -         | <i>strA</i> ,<br><i>strB</i> ,<br><i>aadA2</i> | <i>aac(3)-IIa</i> ,<br><i>strA</i> ,<br><i>strB</i> | <i>aac(6')/lb-cr</i> ,<br><i>aac(3)-IIa</i> ,<br><i>strA</i> ,<br><i>aadA2</i> | <i>aadA2</i> ,<br><i>aac(6')/lb-cr</i>  | <i>aac(6')/lb-cr</i> ,<br><i>b-cr</i> ,<br><i>aph(3')-la</i> | <i>aac(6')-lb</i> ,<br><i>aph(6)-Id</i> ,<br><i>aph(3')-lb</i> | <i>aac(3)-IIa</i> ,<br><i>aac(6')/lb-cr</i> ,<br><i>aph(3')-la</i> ,<br><i>aadA2</i> | <i>aph(3')-la</i> ,<br><i>aac(6')-lb</i> ,<br><i>aadA2</i> | <i>aadA2</i> ,<br><i>aac(6')/lb-cr</i> ,<br><i>aac(3)-IId</i> ,<br><i>aph(3')-la</i> | <i>aac(6')/lb-cr</i> ,<br><i>aadA2</i>   | <i>aph(3')-la</i> ,<br><i>strA</i> ,<br><i>aadA2</i> ,<br><i>aac(6')-lb</i> | <i>aac(6')/lb-cr</i> ,<br><i>aac(3)-IIa</i> ,<br><i>aph(3')-la</i> ,<br><i>aadA1</i> ,<br><i>aadA2</i> | <i>aac(3)-IId</i> ,<br><i>aac(6')/lb-cr</i> | <i>armA</i>                      |
| <b>Fluoroquinolone</b>                          | -                                      | -           | -         | -         | -                                              | <i>qnrB1</i>                                        | <i>aac(6')/lb-cr</i>                                                           | <i>aac(6')/lb-cr</i>                    | <i>aac(6')/lb-cr</i> ,<br><i>qnrB4</i>                       | <i>aac(6')/lb-cr</i>                                           | <i>aac(6')/lb-cr</i>                                                                 | <i>aac(6')/lb-cr</i>                                       | <i>aac(6')/lb-cr</i>                                                                 | <i>aac(6')/lb-cr</i> ,<br><i>qnrB4</i>   | <i>aac(6')/lb-cr</i> ,<br><i>qnrB4</i>                                      | <i>aac(6')/lb-cr</i>                                                                                   | <i>aac(6')/lb-cr</i>                        | -                                |
| <b>Trimethoprim</b>                             | -                                      | -           | -         | -         | <i>dfrA12</i>                                  | <i>dfrA14</i>                                       | <i>dfrA12</i>                                                                  | <i>dfrA12</i>                           | -                                                            | <i>dfrA12</i>                                                  | <i>dfrA12</i>                                                                        | <i>dfrA12</i>                                              | <i>dfrA30</i>                                                                        | <i>dfrA1</i>                             | <i>dfrA14</i> ,<br><i>dfrA12</i>                                            | <i>dfrA12</i>                                                                                          | <i>dfrA14</i> ,<br><i>dfrA17</i>            | -                                |
| <b>Sulphonamide</b>                             | -                                      | -           | -         | -         | -                                              | <i>sul2</i>                                         | <i>sul1</i> ,<br><i>sul2</i>                                                   | <i>sul1</i>                             | <i>sul1</i>                                                  | <i>sul2</i>                                                    | <i>sul1</i>                                                                          | <i>sul1</i>                                                | <i>sul1</i>                                                                          | <i>sul1</i>                              | <i>sul1</i> ,<br><i>sul2</i>                                                | <i>sul1</i> ,<br><i>sul3</i>                                                                           | -                                           | -                                |
| <b>Tetracycline</b>                             | -                                      | -           | -         | -         | <i>tet(A)</i>                                  | <i>tet(A)</i>                                       | <i>tet(A)</i>                                                                  | <i>tet(A)</i>                           | -                                                            | <i>tet(A)</i>                                                  | <i>tet(A)</i>                                                                        | -                                                          | <i>tet(D)</i>                                                                        | <i>tet(A)</i>                            | -                                                                           | <i>tet(A)</i>                                                                                          | -                                           | -                                |
| <b>MLS<sup>a</sup></b>                          | <i>mph(A)</i> ,<br><i>mph(B)</i>       | -           | -         | -         | -                                              | -                                                   | <i>mph(A)</i>                                                                  | <i>mph(A)</i>                           | <i>mph(A)</i>                                                | <i>mph(A)</i>                                                  | <i>mph(A)</i>                                                                        | -                                                          | <i>mph(A)</i>                                                                        | <i>mph(A)</i>                            | <i>mph(A)</i>                                                               | <i>mph(A)</i>                                                                                          | -                                           | <i>msr(E)</i> ,<br><i>mph(E)</i> |
| <b>Phenicol</b>                                 | <i>floR</i>                            | -           | -         | -         | <i>catA1</i>                                   | -                                                   | <i>catA1</i> ,<br><i>catB4</i>                                                 | <i>catB4</i>                            | <i>catB3</i>                                                 | <i>catA2</i>                                                   | <i>catB4</i>                                                                         | <i>catA1</i>                                               | <i>catA1</i> ,<br><i>catB4</i>                                                       | <i>catA1</i> ,<br><i>catB4</i>           | <i>catA1</i>                                                                | <i>catA1</i> ,<br><i>catA4</i> ,<br><i>floR</i> ,<br><i>cmIA1</i>                                      | <i>catB4</i>                                | -                                |

<sup>a</sup>MLS, Macrolide-lincosamide-streptogramin B; <sup>b</sup> ESBLs and carbapenemases are indicated in bold.

**Supplementary Table S3.** Minimum inhibitory concentrations (MICs) for clinical *Klebsiella pneumoniae* isolates. All MICs were determined by antibiotic gradient tests unless otherwise indicated.

|                                   | Veterinary isolates |           |           |           |           |           | Human isolates |       |       |         |         |         |         |         |         |         |         |         |
|-----------------------------------|---------------------|-----------|-----------|-----------|-----------|-----------|----------------|-------|-------|---------|---------|---------|---------|---------|---------|---------|---------|---------|
| Antibiotic agent                  | IHIT27662           | IHIT27663 | IHIT27664 | IHIT27665 | IHIT32358 | IHIT33535 | KP_03          | KP_53 | KP_54 | KP_1153 | KP_1200 | KP_1377 | KP_1585 | KP_1710 | KP_1954 | KP_2442 | KP_3405 | KP_3996 |
| Ampicillin                        | 128                 | 64        | 64        | >256      | >256      | >256      | >256           | >256  | >256  | >256    | >256    | >256    | >256    | >256    | >256    | >256    | >256    | >256    |
| Ampicillin/sulbactam <sup>a</sup> | 2                   | 2         | 2         | >256      | >256      | 16        | >256           | >256  | >256  | >256    | >256    | >256    | >256    | >256    | >256    | >256    | >256    | >256    |
| Piperacillin                      | 2                   | 8         | 8         | >256      | >256      | >256      | >256           | >256  | >256  | >256    | >256    | >256    | >256    | >256    | >256    | >256    | >256    | >256    |
| Cefuroxime                        | 4                   | 4         | 2         | >256      | 4         | >256      | >256           | >256  | >256  | >256    | >256    | >256    | >256    | >256    | >256    | >256    | >256    | >256    |
| Cefepime <sup>b</sup>             | 0.064               | 0.032     | 0.032     | 16        | 0.125     | 2         | 32             | >256  | 8     | >256    | >64     | >64     | >256    | 48      | >256    | >64     | >256    | >256    |
| Ertapenem                         | 0.016               | 0.016     | 0.016     | 8         | 0.032     | 0.064     | 0.125          | >32   | >32   | >32     | 12      | 32      | >32     | 0.125   | >32     | 0.25    | >32     | >32     |
| Gentamicin                        | 0.5                 | 0.5       | 0.5       | 8         | 1         | 32        | 32             | 2     | 1     | 2       | >256    | 2       | >256    | 1       | 2       | 16      | 16      | >256    |
| Levofloxacin <sup>b</sup>         | ≤0.125              | ≤0.125    | ≤0.125    | 4         | >8        | >8        | 1              | >32   | >32   | >32     | >32     | >32     | >32     | >32     | >32     | >32     | >32     | >32     |
| Tigecycline                       | 0.5                 | 0.5       | 0.5       | 4         | 2         | 1         | 0.5            | 2     | 0.5   | 1       | 8       | 1       | 2       | 2       | 4       | 2       | 2       | 2       |
| Colistin <sup>c</sup>             | 8                   | 8         | 8         | 8         | 4         | 2         | 8              | 8     | 8     | 4       | 4       | 4       | 4       | 8       | 16      | 2       | 2       | 2       |
| Colistin <sup>d</sup>             | 24                  | 12        | 24        | 24        | 12        | 32        | 24             | 48    | 256   | 256     | 6       | 12      | 16      | 256     | 256     | 6       | 8       | 12      |
| Colistin <sup>e</sup>             | >16                 | >16       | >16       | >16       | >16       | >16       | 8              | >16   | >16   | >16     | 8       | >16     | >16     | >16     | >16     | 8       | >16     | 8       |

<sup>a</sup>Sulbactam was used at a fixed concentration of 4 mg/L as recommended by EUCAST.

<sup>b</sup>MICs were determined by either antibiotic gradient test or VITEK<sup>®</sup> 2 analysis.

<sup>c</sup>MICs were determined using ETEST<sup>®</sup> and Mueller-Hinton agar (Oxoid).

<sup>d</sup>MICs were determined using ETEST<sup>®</sup> and Mueller-Hinton E agar (bioMérieux).

<sup>e</sup>MICs were determined by VITEK<sup>®</sup> 2 analysis.

**PmrH**

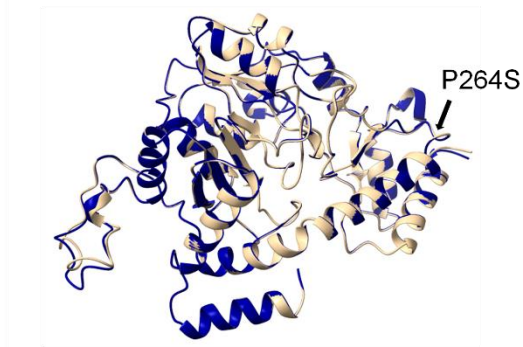

**Figure S1** Superposition of PmrH of *K. pneumoniae* MGH78578 in blue (accession number WP\_004889389.1) and PmrH of KP\_03 in beige. Amino acid substitution P264S is marked by an arrow.

**PmrB**

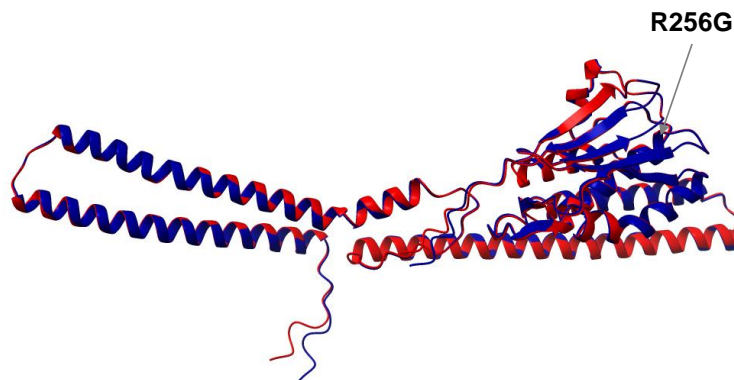

**Figure S2** Superposition of PmrB of *K. pneumoniae* MGH78578 in blue and PmrB (R256G) of IHIT27665 in red. The arrow marks amino acid substitution R256G.

PmrB

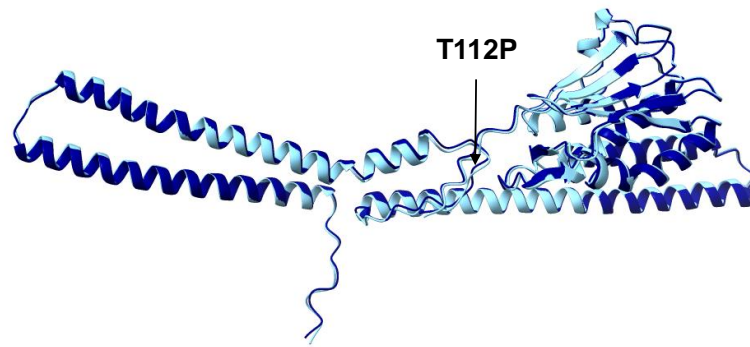

**Figure S3** Superposition of PmrB of *K. pneumoniae* MGH78578 in dark blue and PmrB (T112P) of KP\_54 (light blue). The arrow marks amino acid substitution T112P.
